# Supplementary material for: Detection of Yellow Fever Virus in Sylvatic Mosquitoes during Disease Outbreaks of 2017–2018 in Minas Gerais State, Brazil
Source: PubMed Central journal article supplement (PMC6572267; doi:10.3390/insects10050136), 2019-05-10

Article

# Detection of yellow fever virus in sylvatic mosquitoes during disease outbreaks of 2017–2018 in Minas Gerais State, Brazil

Guilherme Garcia Pinheiro <sup>1,3,\*</sup>, Marcele Neves Rocha <sup>2</sup>, Maria Angélica de Oliveira <sup>1</sup>, Luciano Andrade Moreira <sup>2</sup> and José Dilermando Andrade Filho <sup>3,\*</sup>

<sup>1</sup> Coleção de Mosquitos Neotropicais, Instituto René Rachou, Avenida Augusto de Lima, 1715, Belo Horizonte, 30190-002, Brazil; angelica.oliveira@fiocruz.br

<sup>2</sup> Mosquitos Vetores: Endossimbiontes e Interação Patógeno-Vetor, Instituto René Rachou, Avenida Augusto de Lima, 1715, Belo Horizonte, 30190-002, Brazil; marcele.rocha@fiocruz.br (M.R.), luciano.andrade@fiocruz.br (L.M.)

<sup>3</sup> Grupo de Estudos em Leishmanioses, Instituto René Rachou, Avenida Augusto de Lima, 1715, Belo Horizonte, 30190-002, Brazil

\* Correspondence: ggarciapinheiro@gmail.com (G.P.), jose.andrade@fiocruz.br (J.A.); Tel.: +55-31-3349-7856 (G.P.); Tel.: +55-31-3349-7874 (J.A.)

Received: 25 February 2019; Accepted: date; Published: date

## Supplementary Materials

Table S1. Standard curve values

| Standard curve      | Ct value | Concentration        | Ct Mean | Concentration Mean   |
|---------------------|----------|----------------------|---------|----------------------|
| YFV 10 <sup>7</sup> | 12.02    | 1.16×10 <sup>7</sup> | 11.94   | 1.23×10 <sup>7</sup> |
| YFV 10 <sup>7</sup> | 11.85    | 1.31×10 <sup>7</sup> |         |                      |
| YFV 10 <sup>6</sup> | 15.52    | 9.11×10 <sup>5</sup> | 15.56   | 8.85×10 <sup>5</sup> |
| YFV 10 <sup>6</sup> | 15.6     | 8.59×10 <sup>5</sup> |         |                      |
| YFV10 <sup>5</sup>  | 18.64    | 9.45×10 <sup>4</sup> | 18.68   | 9.19×10 <sup>4</sup> |
| YFV 10 <sup>5</sup> | 18.72    | 8.92×10 <sup>4</sup> |         |                      |
| YFV 10 <sup>4</sup> | 21.7     | 1.03×10 <sup>4</sup> | 21.74   | 1.00×10 <sup>4</sup> |
| YFV 10 <sup>4</sup> | 21.77    | 9.74×10 <sup>3</sup> |         |                      |
| YFV10 <sup>3</sup>  | 25.04    | 9.07×10 <sup>3</sup> | 25.3    | 7.64×10 <sup>2</sup> |
| YFV10 <sup>3</sup>  | 25.56    | 6.22×10 <sup>2</sup> |         |                      |
| YFV10 <sup>2</sup>  | 28.03    | 1.04×10 <sup>2</sup> | 27.68   | 1.38×10 <sup>2</sup> |
| YFV10 <sup>2</sup>  | 27.33    | 1.72×10 <sup>2</sup> |         |                      |

Table S2. Viral quantification and Ct value of the YFV positive samples.

| Sample                        | YFV quantification (RT-qPCR) | Ct value |
|-------------------------------|------------------------------|----------|
| <i>Hg. janthinomys</i> area 2 | 7.90 × 10 <sup>7</sup>       | 18.40    |

|                                    |                        |       |
|------------------------------------|------------------------|-------|
| <i>Hg. janthinomys</i> area 3      | 8.23 × 10 <sup>7</sup> | 18.34 |
| <i>Hg. janthinomys</i> area 4 (1)  | 3.63 × 10 <sup>8</sup> | 16.16 |
| <i>Hg. janthinomys</i> area 4 (2)  | 1.79 × 10 <sup>8</sup> | 17.25 |
| <i>Hg. janthinomys</i> area 4 (3)  | 1.44 × 10 <sup>7</sup> | 20.90 |
| <i>Hg. janthinomys</i> area 4 (4)  | 4.29 × 10 <sup>7</sup> | 19.32 |
| <i>Hg. janthinomys</i> area 4 (5)  | 7.89 × 10 <sup>7</sup> | 18.40 |
| <i>Hg. janthinomys</i> area 4 (6)  | 1.44 × 10 <sup>9</sup> | 14.13 |
| <i>Hg. janthinomys</i> area 4 (7)  | 1.84 × 10 <sup>8</sup> | 17.16 |
| <i>Hg. janthinomys</i> area 4 (8)  | 1.56 × 10 <sup>8</sup> | 17.41 |
| <i>Hg. janthinomys</i> area 4 (9)  | 7.50 × 10 <sup>7</sup> | 18.48 |
| <i>Hg. janthinomys</i> area 4 (10) | 2.71 × 10 <sup>7</sup> | 20.05 |
| <i>Hg. janthinomys</i> area 4 (11) | 3.42 × 10 <sup>7</sup> | 19.64 |

**Table S3.** Viral quantification and Ct values obtained after viral isolation.

| Sample                             | 7 dpi                  |          | 10 dpi                  |          |
|------------------------------------|------------------------|----------|-------------------------|----------|
|                                    | RT-qPCR                | Ct value | RT-qPCR                 | Ct value |
| <i>Hg. janthinomys</i> area 2      | 1.46 × 10 <sup>9</sup> | 15.52    | 4.42 × 10 <sup>9</sup>  | 14.01    |
| <i>Hg. janthinomys</i> area 3      | 2.58 × 10 <sup>8</sup> | 17.91    | 1.42 × 10 <sup>8</sup>  | 18.73    |
| <i>Hg. janthinomys</i> area 4 (1)  | 9.51 × 10 <sup>8</sup> | 16.14    | 1.11 × 10 <sup>10</sup> | 12.73    |
| <i>Hg. janthinomys</i> area 4 (2)  | 4.84 × 10 <sup>8</sup> | 17.05    | 4.90 × 10 <sup>9</sup>  | 13.86    |
| <i>Hg. janthinomys</i> area 4 (3)  | 5.68 × 10 <sup>6</sup> | 23.17    | 2.41 × 10 <sup>9</sup>  | 14.83    |
| <i>Hg. janthinomys</i> area 4 (4)  | 3.26 × 10 <sup>8</sup> | 17.59    | 4.71 × 10 <sup>9</sup>  | 13.91    |
| <i>Hg. janthinomys</i> area 4 (5)  | 2.95 × 10 <sup>9</sup> | 14.55    | 1.31 × 10 <sup>10</sup> | 12.50    |
| <i>Hg. janthinomys</i> area 4 (6)  | 1.03 × 10 <sup>9</sup> | 16.00    | 3.12 × 10 <sup>9</sup>  | 14.48    |
| <i>Hg. janthinomys</i> area 4 (7)  | 3.66 × 10 <sup>9</sup> | 14.25    | 6.18 × 10 <sup>9</sup>  | 13.53    |
| <i>Hg. janthinomys</i> area 4 (8)  | 2.89 × 10 <sup>9</sup> | 14.59    | 7.46 × 10 <sup>9</sup>  | 13.29    |
| <i>Hg. janthinomys</i> area 4 (9)  | 2.17 × 10 <sup>9</sup> | 14.97    | 4.73 × 10 <sup>9</sup>  | 13.90    |
| <i>Hg. janthinomys</i> area 4 (10) | 1.42 × 10 <sup>8</sup> | 18.73    | 9.88 × 10 <sup>8</sup>  | 16.06    |
| <i>Hg. janthinomys</i> area 4 (11) | 6.80 × 10 <sup>6</sup> | 22.92    | 1.30 × 10 <sup>7</sup>  | 22.03    |

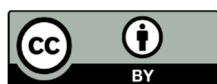

Supplement: insects-10-00136-s001.pdf [file insects-10-00136-s001.pdf]
